# Supplementary material
Source: Copernicus journal article supplement (doi:10.5194/egusphere-2026-3096)
Supplement: Supplementary file 1 [file egusphere-2026-3096-supplement.pdf]

# Supplement to Effectiveness of olivine dissolution for ocean alkalinity enhancement in beach simulations – insights from flow-through experiments

by Geilert, S., Hoogerdijk, L., Ben Hammou Abboud, Y., Pernet, F., Baldermann, A., Volz, J., Wolthers, M., Miller, C.A.

## Supplementary figures

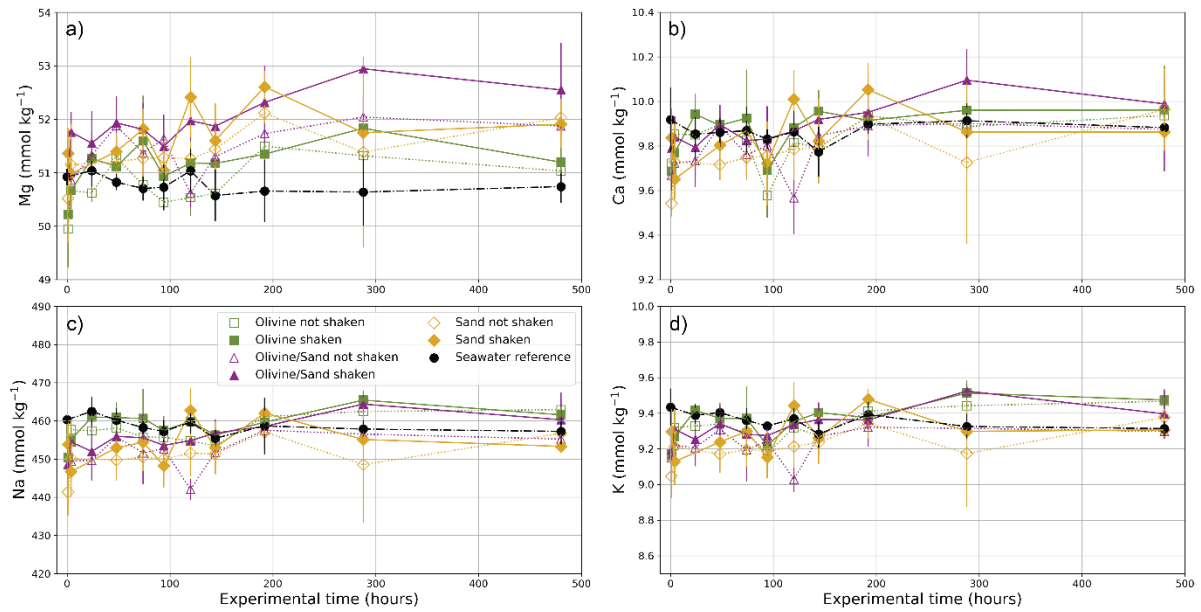

Figure S1: Major element data for the different treatments of the beach simulation experiments, with (a) magnesium (Mg), (b) calcium (Ca), (c) sodium (Na) and (d) and potassium (K). Data points are the average of the three replicates and error indicates 1 SD of the replicates.

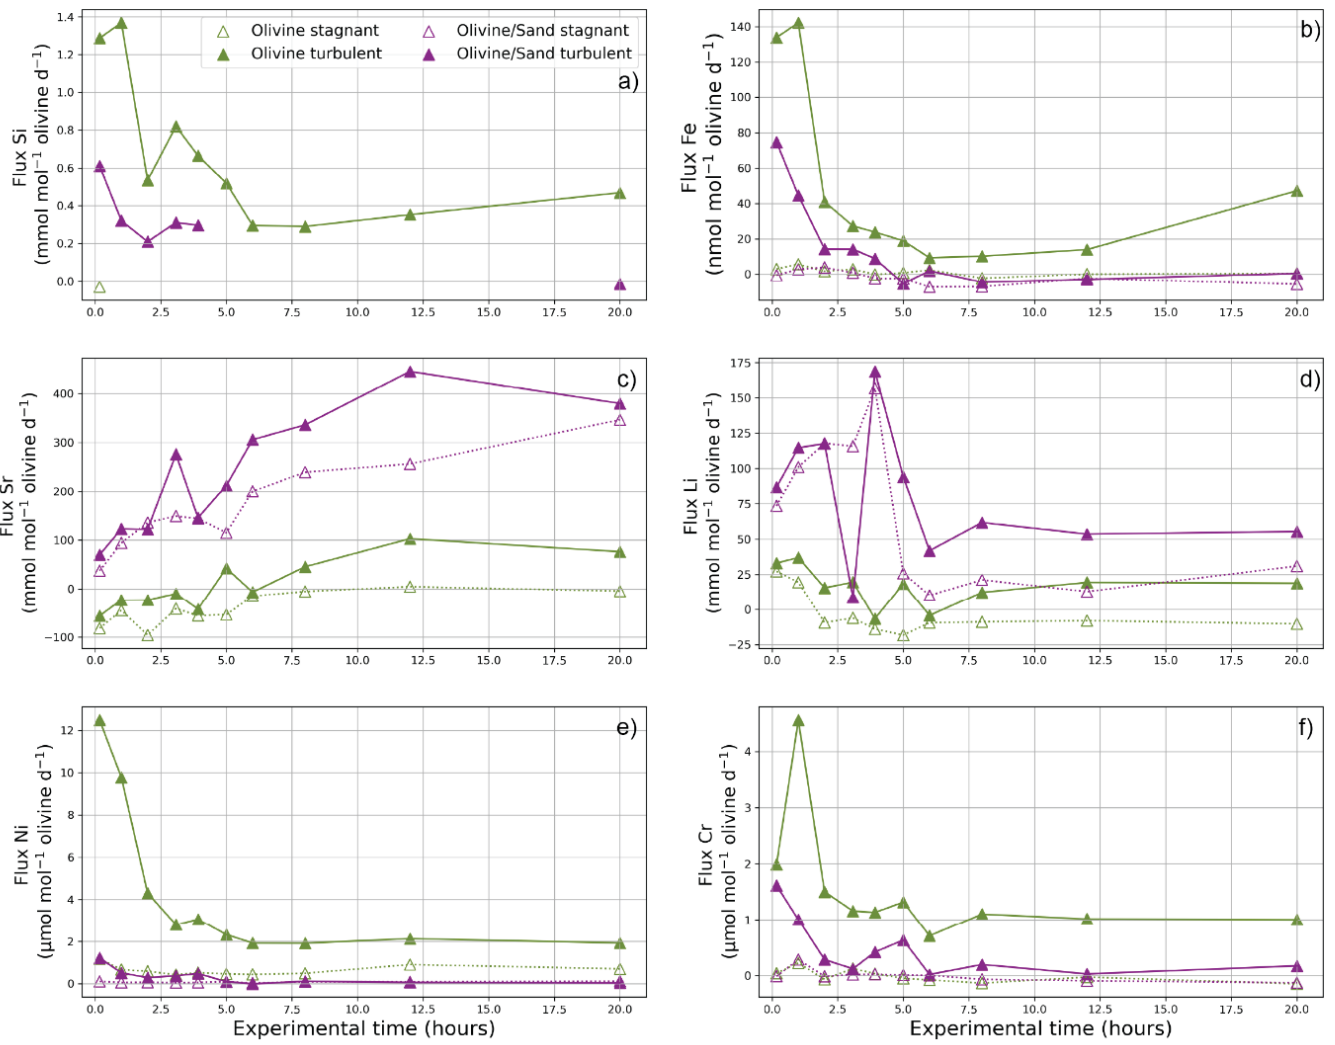

Figure S2: Fluxes for trace elements for the different olivine treatments (pure and olivine/sand mixture), with (a) silicon (Si), (b) iron (Fe), (c) strontium (Sr), (d) lithium (Li), (e) nickel (Ni) and chromium (Cr).

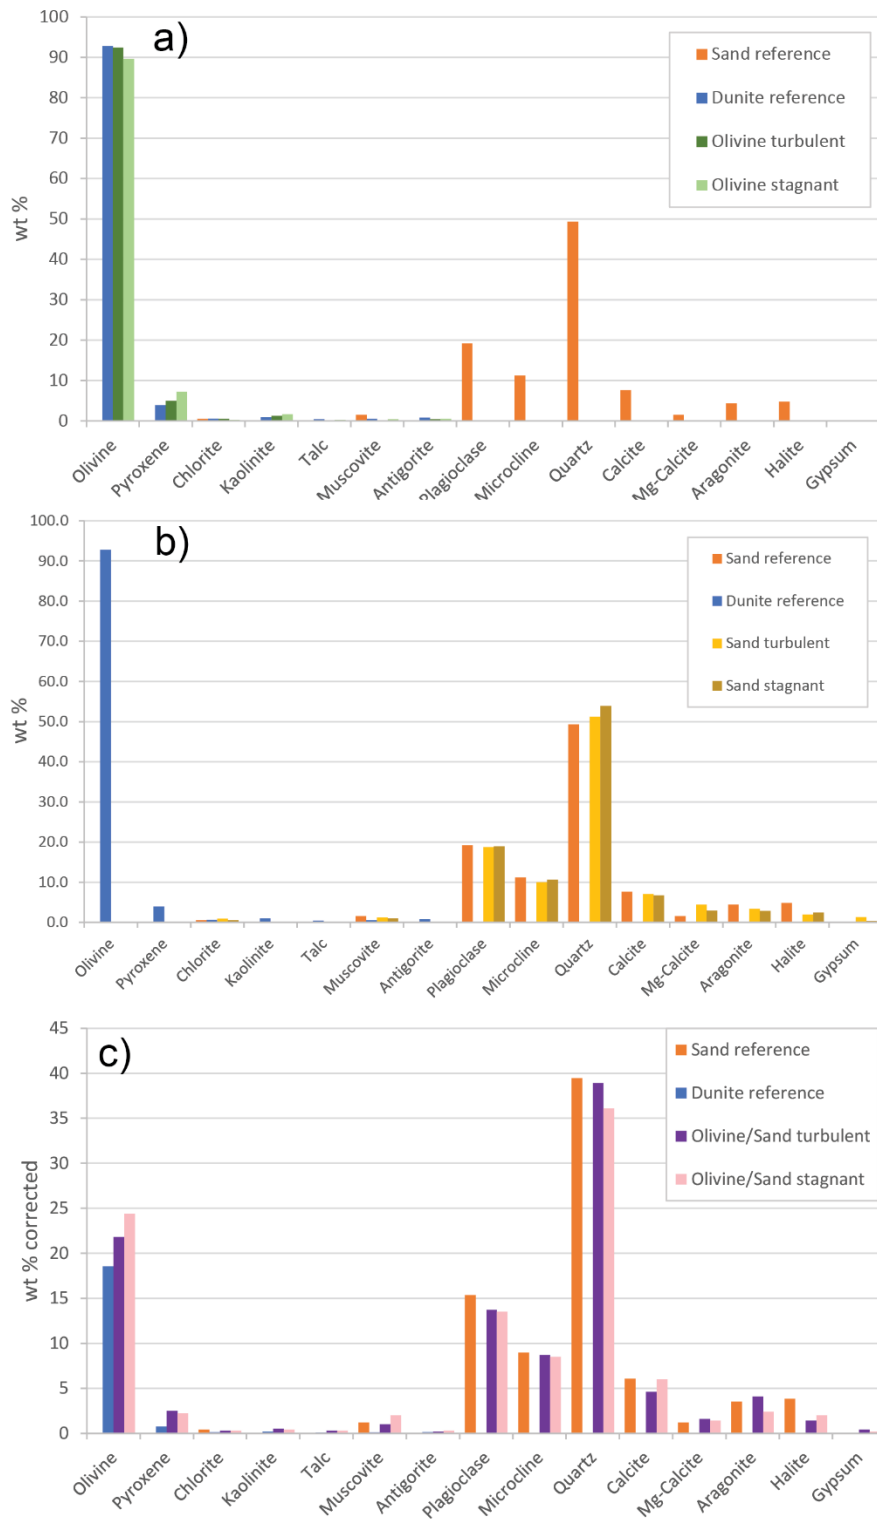

Figure S3: Mineralogical composition in weight percentage (wt%) of stagnant and turbulent.

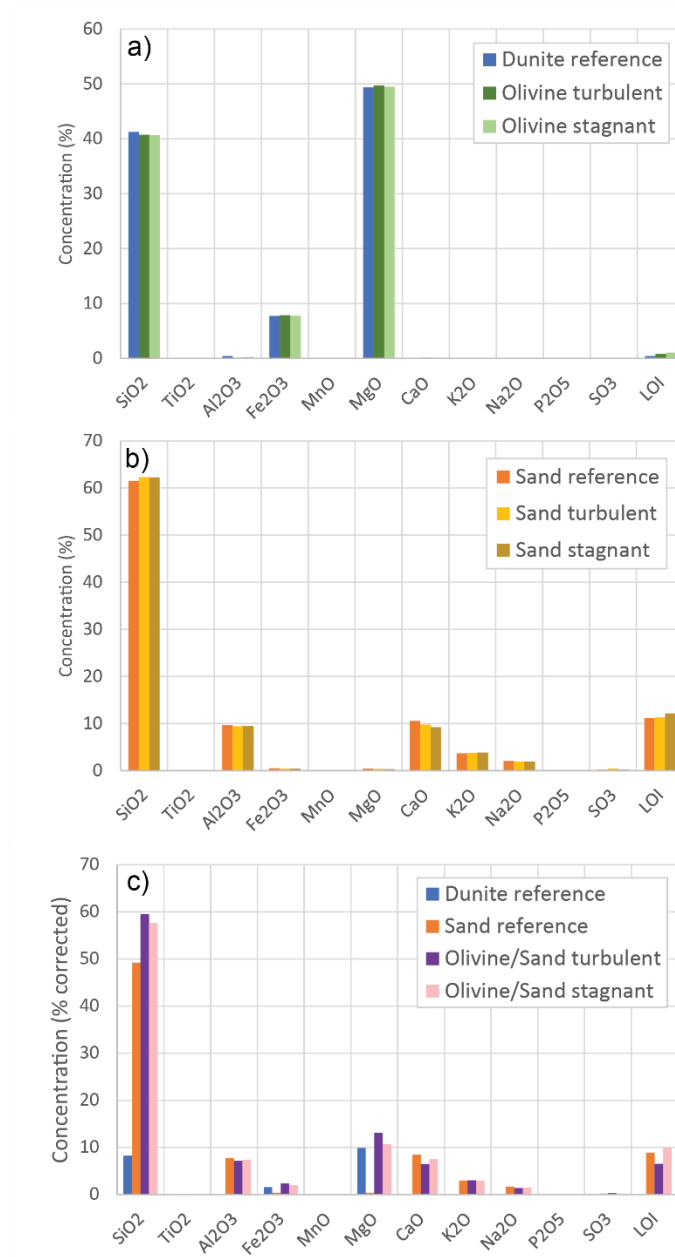

Figure S4: Elemental oxide percentage across all experimental setups (LOI: loss of ignition).

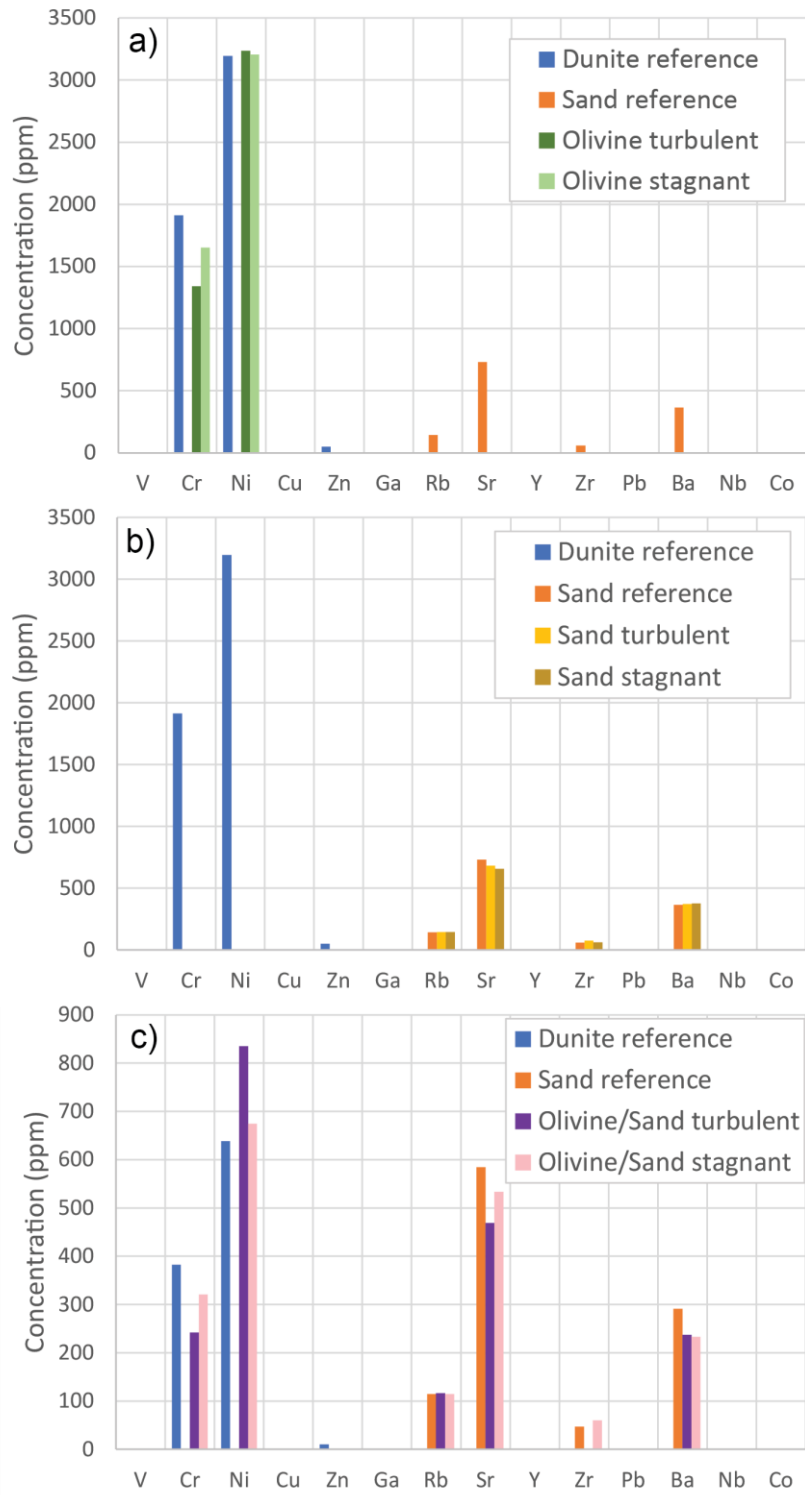

Figure S5: Trace element concentrations for the different experimental conditions and treatments.

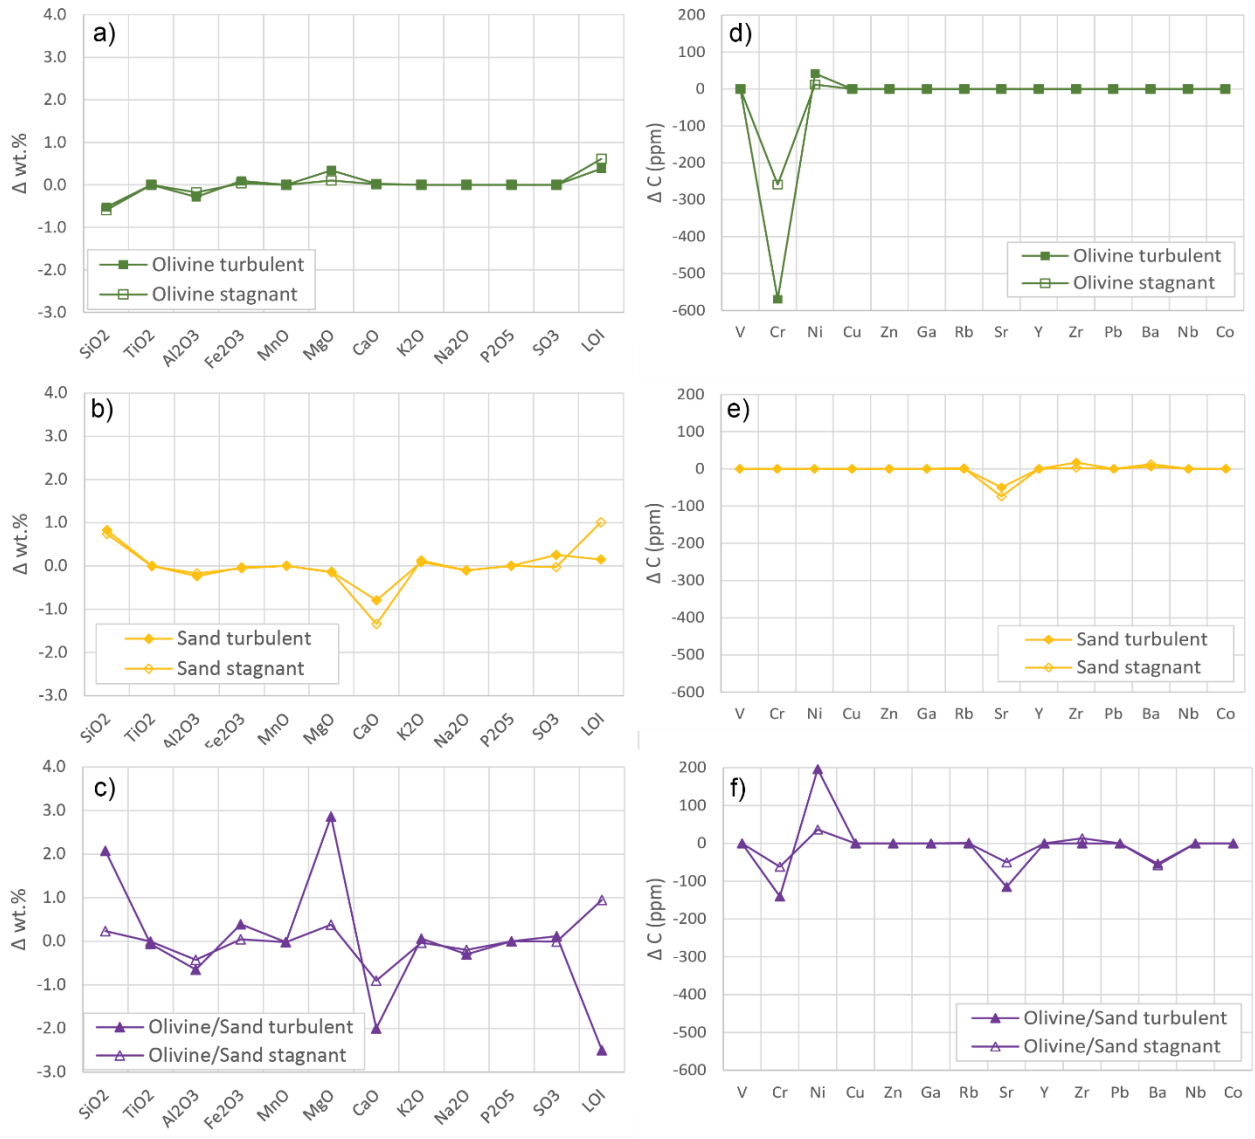

Figure S6: Variation of major and trace element concentration in wt.% and ppm relative to the starting materials ( $\Delta$ C; sand and dunite) for the different experimental treatments. For the olivine/sand experiments, the percentage ratio of starting material was considered.

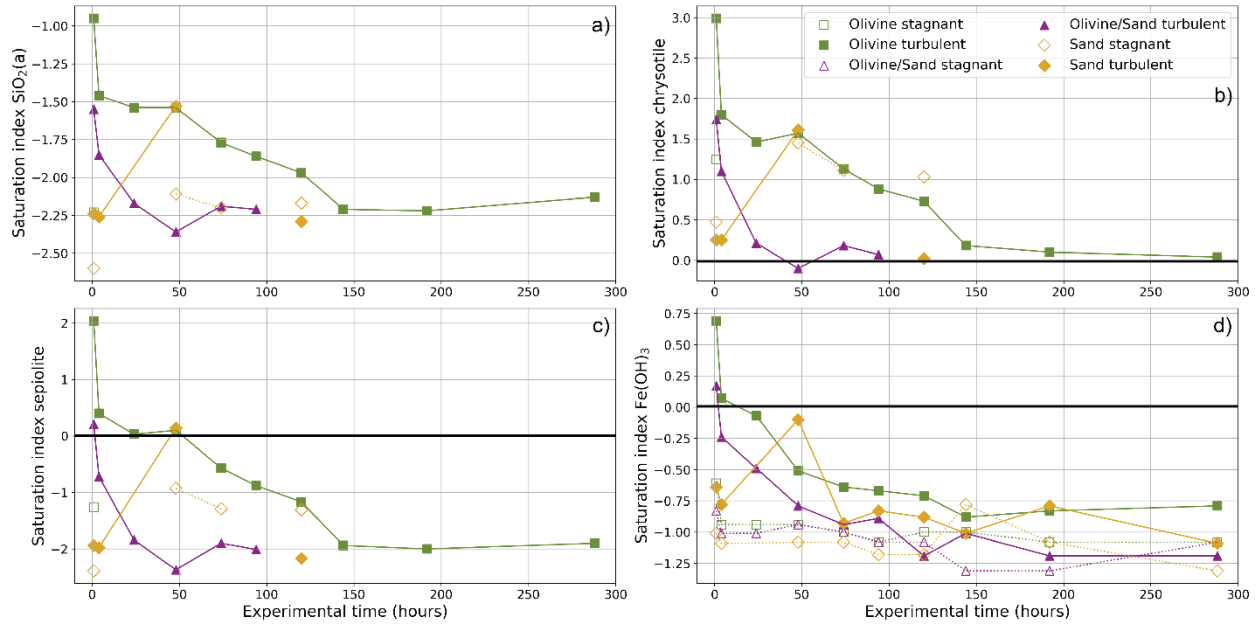

Figure S7: Saturation indices calculated in PHREEQC for (a) amorphous  $\text{SiO}_2$  ( $\text{SiO}_{2(a)}$ ), (b) chrysotile, (c) sepiolite and (d)  $\text{Fe}(\text{OH})_3$ . Note that  $\text{SiO}_{2(a)}$  is undersaturated and chrysotile mostly oversaturated (black line, saturation index > 0) throughout the experiment for all treatments where Si was detectable, while sepiolite and  $\text{Fe}(\text{OH})_3$  are only oversaturated in the first 48 hours of the experiment.

Supplementary tables

Table S1: Experimental results for the carbonate system. Alkalinity and pH are directly measured after sampling, all other parameters calculated using the CO2SYS program. Samples were excluded from the average when the deviation exceeds 5%.

| Sample                | Experimental time (hours) | Alkalinity ( $\mu\text{mol kg}^{-1}$ ) | SD <sub>TA</sub> ( $\mu\text{mol kg}^{-1}$ ) | Alkalinity <sub>sw corrected</sub> ( $\mu\text{mol kg}^{-1}$ ) | Alkalinity <sub>sw-corrected, olivine normalized</sub> ( $\text{mmol mol}^{-1}$ olivine) | pH <sup>a</sup> | SD <sub>pH</sub> | DIC <sup>b</sup> ( $\mu\text{mol kg}^{-1}$ ) | SD <sub>DIC</sub> ( $\mu\text{mol kg}^{-1}$ ) | pCO <sub>2</sub> <sup>b</sup> ( $\mu\text{atm}$ ) | SD <sub>pCO2</sub> ( $\mu\text{atm}$ ) | $\Omega_{\text{aragonite}}$ <sup>b</sup> | SD <sub><math>\Omega_{\text{aragonite}}</math></sub> |
|-----------------------|---------------------------|----------------------------------------|----------------------------------------------|----------------------------------------------------------------|------------------------------------------------------------------------------------------|-----------------|------------------|----------------------------------------------|-----------------------------------------------|---------------------------------------------------|----------------------------------------|------------------------------------------|------------------------------------------------------|
| Olivine stagnant      | 1                         | 2300                                   | 5                                            | -11                                                            | -0.14                                                                                    | 8.32            | 0.01             | 1908                                         | 7                                             | 177                                               | 3                                      | 4.1                                      | 0.04                                                 |
|                       | 4                         | 2305                                   | 1                                            | -6.5                                                           | -0.08                                                                                    | 8.37            | 0.03             | 1882                                         | 17                                            | 156                                               | 12                                     | 4.4                                      | 0.18                                                 |
|                       | 24                        | 2333                                   | 19                                           | 7.3                                                            | 0.09                                                                                     | 8.34            | 0.01             | 1926                                         | 14                                            | 171                                               | 1                                      | 4.2                                      | 0.07                                                 |
|                       | 48                        | 2315                                   | 12                                           | -0.7                                                           | -0.01                                                                                    | 8.34            | 0.00             | 1912                                         | 11                                            | 171                                               | 1                                      | 4.2                                      | 0.02                                                 |
|                       | 74                        | 2311                                   | 5                                            | -6.3                                                           | -0.08                                                                                    | 8.28            | 0.01             | 1943                                         | 9                                             | 200                                               | 4                                      | 3.8                                      | 0.04                                                 |
|                       | 94                        | 2307                                   | 5                                            | -1.1                                                           | -0.01                                                                                    | 8.29            | 0.01             | 1939                                         | 11                                            | 198                                               | 6                                      | 3.8                                      | 0.06                                                 |
|                       | 120                       | 2313                                   | 14                                           | -7.6                                                           | -0.10                                                                                    | 8.26            | 0.01             | 1960                                         | 13                                            | 212                                               | 4                                      | 3.7                                      | 0.04                                                 |
|                       | 144                       | 2310                                   | 5                                            | -12                                                            | -0.15                                                                                    | 8.26            | 0.01             | 1960                                         | 2                                             | 214                                               | 3                                      | 3.7                                      | 0.04                                                 |
|                       | 192                       | 2316                                   | 4                                            | 9.1                                                            | 0.12                                                                                     | 8.27            | 0.01             | 1959                                         | 5                                             | 210                                               | 6                                      | 3.7                                      | 0.07                                                 |
|                       | 288                       | 2318                                   | 4                                            | 4.6                                                            | 0.06                                                                                     | 8.24            | 0.01             | 1976                                         | 6                                             | 225                                               | 3                                      | 3.6                                      | 0.03                                                 |
|                       | 480                       | 2297                                   | 9                                            | -4.9                                                           | -0.06                                                                                    | 8.02            | 0.01             | 2080                                         | 14                                            | 412                                               | 14                                     | 2.4                                      | 0.05                                                 |
|                       | Olivine turbulent         | 1                                      | 2359                                         | 10                                                             | 47                                                                                       | 0.60            | 8.18             | 0.01                                         | 2054                                          | 11                                                | 278                                    | 8                                        | 3.2                                                  |
| 4                     |                           | 2375                                   | 9                                            | 64                                                             | 0.82                                                                                     | 8.15            | 0.02             | 2082                                         | 20                                            | 299                                               | 20                                     | 3.1                                      | 0.12                                                 |
| 24                    |                           | 2428                                   | 22                                           | 102                                                            | 1.30                                                                                     | 8.12            | 0.02             | 2152                                         | 24                                            | 338                                               | 18                                     | 3.0                                      | 0.10                                                 |
| 48                    |                           | 2357                                   | 24                                           | 41                                                             | 0.52                                                                                     | 8.14            | 0.03             | 2074                                         | 31                                            | 310                                               | 24                                     | 3.0                                      | 0.14                                                 |
| 74                    |                           | 2344                                   | 39                                           | 27                                                             | 0.34                                                                                     | 8.14            | 0.03             | 2065                                         | 54                                            | 313                                               | 36                                     | 3.0                                      | 0.14                                                 |
| 94                    |                           | 2331                                   | 29                                           | 23                                                             | 0.29                                                                                     | 8.13            | 0.03             | 2053                                         | 45                                            | 310                                               | 33                                     | 3.0                                      | 0.14                                                 |
| 120                   |                           | 2340                                   | 32                                           | 19                                                             | 0.24                                                                                     | 8.14            | 0.02             | 2056                                         | 37                                            | 302                                               | 17                                     | 3.0                                      | 0.04                                                 |
| 144                   |                           | 2329                                   | 34                                           | 6.2                                                            | 0.08                                                                                     | 8.13            | 0.00             | 2056                                         | 31                                            | 315                                               | 5                                      | 2.9                                      | 0.05                                                 |
| 192                   |                           | 2340                                   | 8                                            | 33                                                             | 0.42                                                                                     | 8.12            | 0.01             | 2069                                         | 11                                            | 322                                               | 6                                      | 2.9                                      | 0.02                                                 |
| 288                   |                           | 2345                                   | 16                                           | 31                                                             | 0.39                                                                                     | 8.08            | 0.01             | 2093                                         | 20                                            | 357                                               | 9                                      | 2.7                                      | 0.02                                                 |
| 480                   |                           | 2321                                   | 5                                            | 19                                                             | 0.24                                                                                     | 8.04            | 0.02             | 2095                                         | 10                                            | 402                                               | 18                                     | 2.5                                      | 0.07                                                 |
| Sand stagnant         |                           | 1                                      | 2294                                         | 7                                                              | -17                                                                                      | N.A.            | 8.31             | 0.02                                         | 1910                                          | 16                                                | 182                                    | 11                                       | 4.0                                                  |
|                       | 4                         | 2302                                   | 6                                            | -9.2                                                           | N.A.                                                                                     | 8.36            | 0.04             | 1884                                         | 24                                            | 159                                               | 19                                     | 4.3                                      | 0.28                                                 |
|                       | 24                        | NM                                     | NM                                           | NM                                                             | N.A.                                                                                     | 8.31            | 0.01             | NM                                           | NM                                            | NM                                                | NM                                     | NM                                       | NM                                                   |
|                       | 48                        | 2314                                   | 6                                            | -2.3                                                           | N.A.                                                                                     | 8.31            | 0.02             | 1926                                         | 5                                             | 183                                               | 8                                      | 4.0                                      | 0.11                                                 |
|                       | 74                        | 2319                                   | 8                                            | 1.7                                                            | N.A.                                                                                     | 8.28            | 0.01             | 1952                                         | 8                                             | 202                                               | 6                                      | 3.8                                      | 0.08                                                 |
|                       | 94                        | 2312                                   | 8                                            | 4.6                                                            | N.A.                                                                                     | 8.27            | 0.01             | 1954                                         | 8                                             | 208                                               | 3                                      | 3.7                                      | 0.04                                                 |
|                       | 120                       | 2334                                   | 15                                           | 13                                                             | N.A.                                                                                     | 8.26            | 0.01             | 1983                                         | 11                                            | 219                                               | 5                                      | 3.7                                      | 0.08                                                 |
|                       | 144                       | 2320                                   | 5                                            | -1.9                                                           | N.A.                                                                                     | 8.25            | 0.01             | 1975                                         | 3                                             | 221                                               | 3                                      | 3.6                                      | 0.04                                                 |
|                       | 192                       | 2315                                   | 4                                            | 8.1                                                            | N.A.                                                                                     | 8.26            | 0.00             | 1965                                         | 5                                             | 216                                               | 1                                      | 3.7                                      | 0.01                                                 |
|                       | 288                       | 2319                                   | 8                                            | 5.3                                                            | N.A.                                                                                     | 8.23            | 0.00             | 1987                                         | 5                                             | 236                                               | 1                                      | 3.5                                      | 0.02                                                 |
|                       | 480                       | 2307                                   | 0                                            | 4.8                                                            | N.A.                                                                                     | 8.02            | 0.02             | 2092                                         | 9                                             | 422                                               | 22                                     | 2.4                                      | 0.09                                                 |
|                       | Sand turbulent            | 1                                      | 2324                                         | 3                                                              | 12                                                                                       | N.A.            | 8.15             | /                                            | 2042                                          |                                                   | 298                                    |                                          | 3.0                                                  |
| 4                     |                           | 2329                                   | 11                                           | 18                                                             | N.A.                                                                                     | 8.16            | 0.02             | 2036                                         | 2                                             | 287                                               | 11                                     | 3.1                                      | 0.11                                                 |
| 24                    |                           | NM                                     | NM                                           | NM                                                             | N.A.                                                                                     | 8.14            | 0.03             | NM                                           | NM                                            | NM                                                | NM                                     | NM                                       | NM                                                   |
| 48                    |                           | 2328                                   | 12                                           | 12                                                             | N.A.                                                                                     | 8.19            | 0.07             | 2016                                         | 52                                            | 266                                               | 50                                     | 3.3                                      | 0.38                                                 |
| 74                    |                           | 2335                                   | 4                                            | 18                                                             | N.A.                                                                                     | 8.13            | 0.01             | 2095                                         | 74                                            | 316                                               | 18                                     | 3.0                                      | 0.08                                                 |
| 94                    |                           | 2333                                   | 15                                           | 26                                                             | N.A.                                                                                     | 8.13            | 0.01             | 2060                                         | 21                                            | 316                                               | 11                                     | 2.9                                      | 0.04                                                 |
| 120                   |                           | 2335                                   | 6                                            | 14                                                             | N.A.                                                                                     | 8.14            | 0.01             | 2055                                         | 5                                             | 307                                               | 8                                      | 3.0                                      | 0.06                                                 |
| 144                   |                           | 2328                                   | 18                                           | 6.0                                                            | N.A.                                                                                     | 8.13            | 0.01             | 2053                                         | 23                                            | 312                                               | 13                                     | 2.9                                      | 0.04                                                 |
| 192                   |                           | 2335                                   | 15                                           | 28                                                             | N.A.                                                                                     | 8.12            | 0.01             | 2066                                         | 20                                            | 325                                               | 11                                     | 2.9                                      | 0.05                                                 |
| 288                   |                           | 2329                                   | 9                                            | 15                                                             | N.A.                                                                                     | 8.08            | 0.01             | 2078                                         | 14                                            | 355                                               | 13                                     | 2.7                                      | 0.06                                                 |
| 480                   |                           | 2316                                   | 2                                            | 14                                                             | N.A.                                                                                     | 8.03            | 0.01             | 2093                                         | 7                                             | 404                                               | 13                                     | 2.4                                      | 0.06                                                 |
| Olivine-sand stagnant |                           | 1                                      | 2283                                         | 26                                                             | -28                                                                                      | -0.69           | 8.27             | 0.09                                         | 1926                                          | 33                                                | 209                                    | 55                                       | 3.7                                                  |
|                       | 4                         | 2301                                   | 3                                            | -11                                                            | -0.08                                                                                    | 8.37            | 0.03             | 1873                                         | 20                                            | 153                                               | 15                                     | 4.4                                      | 0.22                                                 |
|                       | 24                        | 2333                                   | 14                                           | 6.7                                                            | 0.57                                                                                     | 8.32            | 0.01             | 1937                                         | 18                                            | 180                                               | 7                                      | 4.1                                      | 0.05                                                 |
|                       | 48                        | 2313                                   | 5                                            | -3.3                                                           | -0.06                                                                                    | 8.32            | 0.02             | 1918                                         | 8                                             | 178                                               | 8                                      | 4.1                                      | 0.11                                                 |
|                       | 74                        | 2304                                   | 7                                            | -13                                                            | -0.70                                                                                    | 8.29            | 0.00             | 1935                                         | 6                                             | 197                                               | 1                                      | 3.8                                      | 0.02                                                 |
|                       | 94                        | 2308                                   | 1                                            | 0.32                                                           | -0.27                                                                                    | 8.28            | 0.02             | 1946                                         | 13                                            | 204                                               | 11                                     | 3.8                                      | 0.12                                                 |
|                       | 120                       | 2321                                   | 6                                            | -0.34                                                          | -0.87                                                                                    | 8.23            | 0.02             | 1987                                         | 9                                             | 235                                               | 14                                     | 3.5                                      | 0.13                                                 |
|                       | 144                       | 2313                                   | 7                                            | -10                                                            | -0.49                                                                                    | 8.23            | 0.02             | 1978                                         | 6                                             | 232                                               | 10                                     | 3.5                                      | 0.11                                                 |
|                       | 192                       | 2316                                   | 3                                            | 9.4                                                            | 0.08                                                                                     | 8.24            | 0.01             | 1975                                         | 1                                             | 225                                               | 3                                      | 3.6                                      | 0.03                                                 |
|                       | 288                       | 2324                                   | 4                                            | 11                                                             | 0.34                                                                                     | 8.21            | 0.01             | 2004                                         | 5                                             | 251                                               | 7                                      | 3.4                                      | 0.05                                                 |
|                       | 480                       | 2292                                   | 3                                            | -11                                                            | -0.37                                                                                    | 8.02            | 0.01             | 2057                                         | 36                                            | 411                                               | 17                                     | 2.3                                      | 0.05                                                 |
|                       | Olivine-sand turbulent    | 1                                      | 2323                                         | 8                                                              | 12                                                                                       | -0.03           | 8.17             | 0.02                                         | 2074                                          | 98                                                | 286                                    | 29                                       | 3.2                                                  |
| 4                     |                           | 2339                                   | 11                                           | 28                                                             | 0.64                                                                                     | 8.16            | 0.02             | 2045                                         | 13                                            | 288                                               | 13                                     | 3.1                                      | 0.10                                                 |
| 24                    |                           | 2404                                   | 10                                           | 78                                                             | 4.98                                                                                     | 8.12            | 0.02             | 2130                                         | 20                                            | 335                                               | 18                                     | 3.0                                      | 0.09                                                 |
| 48                    |                           | 2352                                   | 6                                            | 36                                                             | 1.55                                                                                     | 8.13            | 0.02             | 2076                                         | 15                                            | 318                                               | 16                                     | 3.0                                      | 0.09                                                 |
| 74                    |                           | 2342                                   | 5                                            | 25                                                             | 0.50                                                                                     | 8.12            | 0.01             | 2072                                         | 8                                             | 325                                               | 9                                      | 2.9                                      | 0.05                                                 |
| 94                    |                           | 2341                                   | 12                                           | 33                                                             | 0.48                                                                                     | 8.11            | 0.01             | 2074                                         | 12                                            | 329                                               | 6                                      | 2.9                                      | 0.01                                                 |
| 120                   |                           | 2348                                   | 4                                            | 27                                                             | 0.87                                                                                     | 8.11            | 0.01             | 2081                                         | 6                                             | 330                                               | 5                                      | 2.9                                      | 0.03                                                 |
| 144                   |                           | 2331                                   | 3                                            | 8.9                                                            | 0.19                                                                                     | 8.12            | 0.01             | 2062                                         | 5                                             | 321                                               | 5                                      | 2.9                                      | 0.03                                                 |
| 192                   |                           | 2342                                   | 7                                            | 35                                                             | 0.42                                                                                     | 8.11            | 0.01             | 2076                                         | 12                                            | 332                                               | 11                                     | 2.9                                      | 0.05                                                 |
| 288                   |                           | 2336                                   | 3                                            | 23                                                             | 0.48                                                                                     | 8.09            | 0.00             | 2083                                         | 2                                             | 353                                               | 1                                      | 2.7                                      | 0.01                                                 |
| 480                   |                           | 2319                                   | 11                                           | 16                                                             | 0.16                                                                                     | 8.04            | 0.01             | 2092                                         | 9                                             | 398                                               | 11                                     | 2.5                                      | 0.06                                                 |
| Seawater reference    |                           | 1                                      | 2311                                         | 6                                                              | N.A.                                                                                     | N.A.            | 8.42             | 0.02                                         | 1854                                          | 9                                                 | 135                                    | 7                                        | 4.7                                                  |
|                       | 4                         | NM                                     | NM                                           | N.A.                                                           | N.A.                                                                                     | NM              | NM               | NM                                           | NM                                            | NM                                                | NM                                     | NM                                       | NM                                                   |
|                       | 24                        | 2326                                   | 25                                           | N.A.                                                           | N.A.                                                                                     | 8.38            | /                | 1892                                         | 22                                            | 152                                               | 2                                      | 4.5                                      | 0.05                                                 |
|                       | 48                        | 2316                                   | 2                                            | N.A.                                                           | N.A.                                                                                     | 8.32            | 0.01             | 1923                                         | 4                                             | 178                                               | 3                                      | 4.1                                      | 0.04                                                 |
|                       | 74                        | 2317                                   | 4                                            | N.A.                                                           | N.A.                                                                                     | 8.31            | /                | 1933                                         | 4                                             | 187                                               | 0                                      | 4.0                                      | 0.01                                                 |
|                       | 94                        | 2308                                   | 3                                            | N.A.                                                           | N.A.                                                                                     | 8.25            | 0.02             | 1960                                         | 11                                            | 218                                               | 10                                     | 3.6                                      | 0.09                                                 |
|                       | 120                       | 2321                                   | 5                                            | N.A.                                                           | N.A.                                                                                     | 8.27            | 0.01             | 1960                                         | 10                                            | 208                                               | 7                                      | 3.8                                      | 0.08                                                 |
|                       | 144                       | 2322                                   | 5                                            | N.A.                                                           | N.A.                                                                                     | 8.24            | 0.01             | 1979                                         | 7                                             | 226                                               | 4                                      | 3.6                                      | 0.04                                                 |
|                       | 192                       | 2307                                   | 10                                           | N.A.                                                           | N.A.                                                                                     | 8.24            | 0.02             | 1965                                         | 13                                            | 224                                               | 10                                     | 3.6                                      | 0.09                                                 |
|                       | 288                       | 2313                                   | 5                                            | N.A.                                                           | N.A.                                                                                     | 8.24            | 0.01             | 1973                                         | 8                                             | 229                                               | 7                                      | 3.6                                      | 0.06                                                 |
| 480                   | 2302                      | 11                                     | N.A.                                         | N.A.                                                           | 8.09                                                                                     | 0.01            | 2051             | 11                                           | 348                                           | 10                                                | 2.7                                    | 0.05                                     |                                                      |

<sup>a</sup>pH data is NBS standard corrected

<sup>b</sup>carbonate system is calculated using CO2SYS

Abbreviations and symbols: NM: not measured; NA = not available; / = only one measurement

Table S2: Fluxes for alkalinity and trace elements. Note the different units and that sand treatments are reported in mol day<sup>-1</sup>, not normalized to the olivine content

| Sample                 | Experimental time<br>(hours) | Alkalinity flux                     | Si flux                             | Fe flux                             | Sr flux                             | Li flux                             | Ni flux                             | Cr flux                             |
|------------------------|------------------------------|-------------------------------------|-------------------------------------|-------------------------------------|-------------------------------------|-------------------------------------|-------------------------------------|-------------------------------------|
|                        |                              | (mmol mol olivine d <sup>-1</sup> ) | (mmol mol olivine d <sup>-1</sup> ) | (nmol mol olivine d <sup>-1</sup> ) | (μmol mol olivine d <sup>-1</sup> ) |
| Olivine stagnant       | 1                            |                                     |                                     |                                     |                                     |                                     |                                     |                                     |
|                        | 4                            | 0.16                                | -0.03                               | 3.0                                 | -81                                 | 27                                  | 1.2                                 | 0.0                                 |
|                        | 24                           | 0.59                                | /                                   | 5.7                                 | -45                                 | 19                                  | 0.67                                | 0.23                                |
|                        | 48                           | -0.14                               | /                                   | 1.7                                 | -95                                 | -9.4                                | 0.59                                | -0.06                               |
|                        | 74                           | -0.21                               | /                                   | 2.9                                 | -41                                 | -6.0                                | 0.43                                | 0.13                                |
|                        | 94                           | -0.05                               | /                                   | -0.09                               | -55                                 | -14                                 | 0.52                                | 0.03                                |
|                        | 120                          | -0.21                               | /                                   | 0.80                                | -53                                 | -18                                 | 0.47                                | -0.05                               |
|                        | 144                          | -0.37                               | /                                   | 2.4                                 | -14                                 | -9.4                                | 0.44                                | -0.07                               |
|                        | 192                          | 0.29                                | /                                   | -2.3                                | -5.3                                | -8.9                                | 0.49                                | -0.13                               |
|                        | 288                          | 0.14                                | /                                   | 0.07                                | 4.7                                 | -8.0                                | 0.90                                | -0.02                               |
| 480                    | -0.16                        | /                                   | 0.53                                | -4.4                                | -10                                 | 0.70                                | -0.14                               |                                     |
| Olivine turbulent      | 1                            |                                     |                                     |                                     |                                     |                                     |                                     |                                     |
|                        | 4                            | 3.2                                 | 1.29                                | 134                                 | -56                                 | 33                                  | 12.5                                | 2.0                                 |
|                        | 24                           | 3.8                                 | 1.37                                | 142                                 | -23                                 | 37                                  | 9.8                                 | 4.6                                 |
|                        | 48                           | 0.80                                | 0.53                                | 41                                  | -23                                 | 16                                  | 4.3                                 | 1.5                                 |
|                        | 74                           | 0.76                                | 0.82                                | 27                                  | -10                                 | 20                                  | 2.8                                 | 1.2                                 |
|                        | 94                           | 0.66                                | 0.67                                | 24                                  | -42                                 | -6.6                                | 3.1                                 | 1.1                                 |
|                        | 120                          | 0.60                                | 0.52                                | 19                                  | 42                                  | 18                                  | 2.3                                 | 1.3                                 |
|                        | 144                          | 0.17                                | 0.30                                | 9.3                                 | -6.6                                | -4.3                                | 1.9                                 | 0.7                                 |
|                        | 192                          | 1.0                                 | 0.29                                | 10                                  | 46                                  | 12                                  | 1.9                                 | 1.1                                 |
|                        | 288                          | 1.0                                 | 0.35                                | 14                                  | 103                                 | 19                                  | 2.1                                 | 1.0                                 |
| 480                    | 0.56                         | 0.47                                | 47                                  | 76                                  | 19                                  | 1.9                                 | 1.0                                 |                                     |
| Olivine-sand stagnant  | 1                            |                                     |                                     |                                     |                                     |                                     |                                     |                                     |
|                        | 4                            | 5.0                                 | /                                   | -0.61                               | 37                                  | 73                                  | 0.10                                | -0.01                               |
|                        | 24                           | 1.5                                 | /                                   | 2.9                                 | 94                                  | 101                                 | 0.06                                | 0.29                                |
|                        | 48                           | -1.2                                | /                                   | 3.9                                 | 136                                 | 118                                 | 0.07                                | -0.01                               |
|                        | 74                           | -2.5                                | /                                   | 0.86                                | 149                                 | 116                                 | 0.05                                | 0.02                                |
|                        | 94                           | -0.50                               | /                                   | -2.4                                | 144                                 | 157                                 | 0.06                                | 0.03                                |
|                        | 120                          | -2.2                                | /                                   | -2.4                                | 115                                 | 26                                  | 0.10                                | 0.01                                |
|                        | 144                          | -1.1                                | /                                   | -7.1                                | 200                                 | 10                                  | 0.03                                | 0.01                                |
|                        | 192                          | 0.27                                | /                                   | -6.9                                | 239                                 | 21                                  | 0.09                                | -0.06                               |
|                        | 288                          | 0.84                                | /                                   | -2.4                                | 256                                 | 13                                  | 0.08                                | -0.09                               |
| 480                    | -2.4                         | /                                   | -5.5                                | 347                                 | 31                                  | 0.12                                | -0.12                               |                                     |
| Olivine-sand turbulent | 1                            |                                     |                                     |                                     |                                     |                                     |                                     |                                     |
|                        | 4                            | 5.5                                 | 0.61                                | 75                                  | 70                                  | 87                                  | 1.212                               | 1.614                               |
|                        | 24                           | 11                                  | 0.32                                | 44                                  | 123                                 | 115                                 | 0.516                               | 1.005                               |
|                        | 48                           | 2.1                                 | 0.21                                | 14                                  | 122                                 | 118                                 | 0.284                               | 0.285                               |
|                        | 74                           | 0.86                                | 0.31                                | 14                                  | 276                                 | 8.6                                 | 0.374                               | 0.123                               |
|                        | 94                           | 1.1                                 | 0.30                                | 8.9                                 | 146                                 | 169                                 | 0.482                               | 0.421                               |
|                        | 120                          | 2.2                                 | /                                   | -5.3                                | 212                                 | 94                                  | 0.098                               | 0.634                               |
|                        | 144                          | 0.33                                | /                                   | 1.9                                 | 306                                 | 42                                  | -0.003                              | 0.022                               |
|                        | 192                          | 1.0                                 | /                                   | -4.4                                | 336                                 | 62                                  | 0.112                               | 0.199                               |
|                        | 288                          | 1.2                                 | /                                   | -2.9                                | 446                                 | 54                                  | 0.061                               | 0.032                               |
| 480                    | 0.36                         | /                                   | 0.50                                | 380                                 | 55                                  | 0.040                               | 0.175                               |                                     |
|                        |                              | (mmol d <sup>-1</sup> )             | (mmol d <sup>-1</sup> )             | (nmol d <sup>-1</sup> )             | (μmol d <sup>-1</sup> )             |
| Sand stagnant          | 1                            |                                     |                                     |                                     |                                     |                                     |                                     |                                     |
|                        | 4                            | 0.02                                | 0                                   | -0.20                               | 6.7                                 | 6.8                                 | 0.05                                | 0.01                                |
|                        | 24                           | /                                   | /                                   | 0.80                                | 6.4                                 | 7.0                                 | 0.04                                | 0                                   |
|                        | 48                           | 0                                   | 0.03                                | -0.08                               | 7.4                                 | 8.0                                 | 0.04                                | 0                                   |
|                        | 74                           | 0.01                                | 0.02                                | -0.12                               | 18                                  | 12                                  | 0.04                                | 0                                   |
|                        | 94                           | 0.01                                | 0                                   | -0.24                               | 10                                  | 11                                  | 0.03                                | 0.01                                |
|                        | 120                          | 0.04                                | 0.03                                | -0.27                               | 9.1                                 | 12                                  | 0.04                                | 0                                   |
|                        | 144                          | -0.01                               | /                                   | -0.31                               | 19                                  | 2.0                                 | 0.02                                | 0                                   |
|                        | 192                          | 0.02                                | /                                   | -0.30                               | 23                                  | 2.8                                 | 0.02                                | 0                                   |
|                        | 288                          | 0.01                                | /                                   | -0.19                               | 26                                  | 2.7                                 | 0.03                                | 0                                   |
| 480                    | 0.01                         | /                                   | -0.29                               | 24                                  | 2.5                                 | 0.02                                | -0.01                               |                                     |
| Sand turbulent         | 1                            |                                     |                                     |                                     |                                     |                                     |                                     |                                     |
|                        | 4                            | 0.07                                | 0.02                                | 0.95                                | 2.2                                 | 5.5                                 | 0.08                                | -0.01                               |
|                        | 24                           | /                                   | 0.11                                | 11                                  | 8.2                                 | 8.5                                 | 0.59                                | 0.13                                |
|                        | 48                           | 0.03                                | 0                                   | 0.33                                | 9.0                                 | 8.3                                 | 0.06                                | 0.05                                |
|                        | 74                           | 0.04                                | /                                   | 0.90                                | 13                                  | 11                                  | 0.03                                | 0.01                                |
|                        | 94                           | 0.06                                | 0.02                                | 0.57                                | 10                                  | 10                                  | 0.03                                | -0.01                               |
|                        | 120                          | 0.03                                | /                                   | 0.25                                | 18                                  | 15                                  | 0.03                                | 0                                   |
|                        | 144                          | 0.01                                | /                                   | 1.2                                 | 18                                  | 2.7                                 | 0.03                                | 0.19                                |
|                        | 192                          | 0.07                                | /                                   | -0.13                               | 27                                  | 4.7                                 | 0.02                                | 0                                   |
|                        | 288                          | 0.04                                | /                                   | -0.56                               | 24                                  | 2.8                                 | 0.02                                | -0.01                               |
| 480                    | 0.03                         | /                                   | -0.06                               | 27                                  | 4.0                                 | 0.03                                | 0                                   |                                     |

Symbol explanation: / elemental concentration below detection limit

Table S3: Major and trace element data. Samples were excluded from the average when the deviation exceeds 5%.

| Sample                 | Exp. time (hours) | Ca (mmol L <sup>-1</sup> ) | SD <sub>Ca</sub> (mmol L <sup>-1</sup> ) | K (mmol L <sup>-1</sup> ) | SD <sub>K</sub> (mmol L <sup>-1</sup> ) | Mg (mmol L <sup>-1</sup> ) | SD <sub>Mg</sub> (mmol L <sup>-1</sup> ) | Na (mmol L <sup>-1</sup> ) | SD <sub>Na</sub> (mmol L <sup>-1</sup> ) | Si (μmol L <sup>-1</sup> ) | SD <sub>Si</sub> (μmol L <sup>-1</sup> ) | Li (μmol L <sup>-1</sup> ) | SD <sub>Li</sub> (μmol L <sup>-1</sup> ) | Sr (μmol L <sup>-1</sup> ) | SD <sub>Sr</sub> (μmol L <sup>-1</sup> ) | Cr (nmol L <sup>-1</sup> ) | SD <sub>Cr</sub> (nmol L <sup>-1</sup> ) | Fe (nmol L <sup>-1</sup> ) | SD <sub>Fe</sub> (nmol L <sup>-1</sup> ) | Ni (nmol L <sup>-1</sup> ) | SD <sub>Ni</sub> (nmol L <sup>-1</sup> ) |
|------------------------|-------------------|----------------------------|------------------------------------------|---------------------------|-----------------------------------------|----------------------------|------------------------------------------|----------------------------|------------------------------------------|----------------------------|------------------------------------------|----------------------------|------------------------------------------|----------------------------|------------------------------------------|----------------------------|------------------------------------------|----------------------------|------------------------------------------|----------------------------|------------------------------------------|
| Olivine stagnant       | 1                 | 9.7                        | 0.2                                      | 9.2                       | 0.12                                    | 49.9                       | 0.7                                      | 450                        | 5                                        | 9.3                        | /                                        | 27.4                       | 0.2                                      | 94.6                       | 0.8                                      | 50.9                       | 9.0                                      | 1.5                        | 0.3                                      | 73.3                       | 9.7                                      |
|                        | 4                 | 9.9                        | 0.1                                      | 9.3                       | 0.02                                    | 50.7                       | 0.3                                      | 458                        | 2                                        | bdl                        | /                                        | 26.8                       | 0.3                                      | 94.7                       | 1.4                                      | 20.7                       | 7.2                                      | 0.7                        | 0.2                                      | 42.3                       | 8.7                                      |
|                        | 24                | 9.9                        | 0.1                                      | 9.3                       | 0.07                                    | 50.6                       | 0.2                                      | 457                        | 3                                        | bdl                        | /                                        | 26.5                       | 0.4                                      | 95.9                       | 0.8                                      | 23.4                       | 10.6                                     | 0.7                        | 0.1                                      | 22.8                       | 5.3                                      |
|                        | 48                | 9.9                        | 0.0                                      | 9.3                       | 0.06                                    | 51.3                       | 0.3                                      | 458                        | 4                                        | bdl                        | /                                        | 25.5                       | 0.2                                      | 94.3                       | 0.3                                      | 14.1                       | 2.8                                      | 0.6                        | 0.1                                      | 19.9                       | 2.8                                      |
|                        | 74                | 9.8                        | 0.15                                     | 9.3                       | 0.06                                    | 50.8                       | 0.3                                      | 456                        | 3                                        | bdl                        | /                                        | 25.6                       | 0.5                                      | 96.0                       | 2.3                                      | 20.3                       | 7.3                                      | 0.6                        | 0.1                                      | 14.5                       | 5.3                                      |
|                        | 94                | 9.6                        | 0.1                                      | 9.2                       | 0.02                                    | 50.4                       | 0.2                                      | 456                        | 1                                        | bdl                        | /                                        | 25.4                       | 0.1                                      | 95.6                       | 0.7                                      | 17.2                       | 7.6                                      | 0.5                        | 0.1                                      | 17.7                       | 7.8                                      |
|                        | 120               | 9.8                        | 0.0                                      | 9.3                       | 0.06                                    | 50.5                       | 0.3                                      | 455                        | 4                                        | bdl                        | /                                        | 25.2                       | 0.3                                      | 95.7                       | 0.9                                      | 14.6                       | 5.1                                      | 0.6                        | 0.1                                      | 15.9                       | 3.5                                      |
|                        | 144               | 9.8                        | 0.16                                     | 9.3                       | 0.12                                    | 50.6                       | 0.4                                      | 453                        | 2                                        | bdl                        | /                                        | 25.5                       | 0.3                                      | 96.9                       | 1.2                                      | 13.6                       | 1.7                                      | 0.6                        | 0.1                                      | 15.1                       | 3.6                                      |
|                        | 192               | 9.9                        | 0.1                                      | 9.4                       | 0.05                                    | 51.5                       | 0.2                                      | 461                        | 1                                        | bdl                        | /                                        | 25.5                       | 0.3                                      | 97.2                       | 0.6                                      | 11.8                       | 1.6                                      | 0.5                        | 0.2                                      | 16.7                       | 4.0                                      |
|                        | 288               | 9.9                        | 0.1                                      | 9.4                       | 0.02                                    | 51.3                       | 0.1                                      | 462                        | 3                                        | bdl                        | /                                        | 25.6                       | 0.3                                      | 97.6                       | 1.2                                      | 15.3                       | 4.4                                      | 0.5                        | 0.0                                      | 30.2                       | 10.1                                     |
| 480                    | 9.9               | 0.0                        | 9.5                                      | 0.05                      | 51.0                                    | 0.3                        | 463                                      | 2                          | bdl                                      | /                          | 25.5                                     | 0.2                        | 97.3                                     | 0.5                        | 11.4                                     | 5.3                        | 0.6                                      | 0.1                        | 23.6                                     | 5.7                        |                                          |
| Olivine turbulent      | 1                 | 9.7                        | 0.1                                      | 9.2                       | 0.04                                    | 50.2                       | 0.4                                      | 450                        | 3                                        | 178.6                      | 38.3                                     | 28.1                       | 0.4                                      | 93.3                       | 0.7                                      | 896.2                      | 67.6                                     | 29.5                       | 6.9                                      | 1632.0                     | 450                                      |
|                        | 4                 | 9.8                        | 0.1                                      | 9.3                       | 0.12                                    | 50.7                       | 0.4                                      | 455                        | 5                                        | 55.0                       | 31.0                                     | 27.0                       | 0.2                                      | 95.4                       | 0.3                                      | 158.2                      | 76.3                                     | 7.2                        | 4.4                                      | 524.7                      | 245                                      |
|                        | 24                | 9.9                        | 0.1                                      | 9.4                       | 0.03                                    | 51.3                       | 0.2                                      | 461                        | 1                                        | 45.0                       | 15.0                                     | 27.0                       | 0.6                                      | 96.6                       | 1.7                                      | 165.2                      | 29.0                                     | 5.2                        | 1.3                                      | 324.0                      | 80.4                                     |
|                        | 48                | 9.9                        | 0.1                                      | 9.4                       | 0.09                                    | 51.1                       | 0.3                                      | 461                        | 4                                        | 17.7                       | 2.3                                      | 26.3                       | 0.1                                      | 96.7                       | 0.2                                      | 66.1                       | 11.9                                     | 1.9                        | 0.7                                      | 143.1                      | 29.7                                     |
|                        | 74                | 9.9                        | 0.2                                      | 9.4                       | 0.18                                    | 51.6                       | 0.8                                      | 461                        | 8                                        | 26.8                       | /                                        | 26.5                       | 0.2                                      | 97.1                       | 0.4                                      | 54.1                       | 38.6                                     | 1.4                        | 1.0                                      | 92.7                       | 66.1                                     |
|                        | 94                | 9.7                        | 0.1                                      | 9.2                       | 0.10                                    | 50.9                       | 0.3                                      | 458                        | 4                                        | 21.8                       | 18.1                                     | 25.6                       | 0.2                                      | 96.0                       | 0.5                                      | 53.3                       | 31.2                                     | 1.3                        | 0.7                                      | 100.7                      | 72.1                                     |
|                        | 120               | 9.9                        | 0.02                                     | 9.4                       | 0.002                                   | 51.2                       | 0.3                                      | 460                        | 1                                        | 17.0                       | 10.8                                     | 26.4                       | 0.3                                      | 98.8                       | 1.1                                      | 59.2                       | 21.4                                     | 1.2                        | 0.7                                      | 76.8                       | 39.0                                     |
|                        | 144               | 10.0                       | 0.1                                      | 9.4                       | 0.03                                    | 51.2                       | 0.1                                      | 456                        | 2                                        | 9.7                        | 1.0                                      | 25.7                       | 0.3                                      | 97.2                       | 1.9                                      | 39.4                       | 9.9                                      | 0.8                        | 0.3                                      | 63.6                       | 5.6                                      |
|                        | 192               | 9.9                        | 0.1                                      | 9.4                       | 0.09                                    | 51.3                       | 0.3                                      | 460                        | 4                                        | 9.5                        | 1.7                                      | 26.2                       | 0.3                                      | 98.9                       | 1.6                                      | 52.2                       | 6.4                                      | 0.9                        | 0.1                                      | 63.3                       | 16.1                                     |
|                        | 288               | 10.0                       | 0.0                                      | 9.5                       | 0.07                                    | 51.8                       | 0.3                                      | 465                        | 2                                        | 11.5                       | 4.7                                      | 26.5                       | 0.9                                      | 101                        | 3.1                                      | 48.4                       | 31.1                                     | 1.0                        | 0.4                                      | 70.3                       | 34.3                                     |
| 480                    | 10.0              | 0.2                        | 9.5                                      | 0.06                      | 51.2                                    | 0.4                        | 462                                      | 4                          | 15.3                                     | 6.7                        | 26.4                                     | 0.8                        | 100                                      | 2.9                        | 49.0                                     | 13.0                       | 2.1                                      | 1.7                        | 63.6                                     | 15.3                       |                                          |
| Sand stagnant          | 1                 | 9.5                        | 0.1                                      | 9.0                       | 0.12                                    | 50.5                       | 0.8                                      | 441                        | 6                                        | 4.0                        | /                                        | 28.1                       | 0.6                                      | 97.2                       | 2.2                                      | 29.0                       | 21.9                                     | 0.6                        | 0.2                                      | 26.0                       | 6.3                                      |
|                        | 4                 | 9.7                        | 0.2                                      | 9.2                       | 0.22                                    | 51.1                       | 0.8                                      | 450                        | 10                                       | bdl                        | /                                        | 28.6                       | 0.7                                      | 100                        | 2.6                                      | 21.2                       | 5.4                                      | 0.5                        | 0.1                                      | 23.4                       | 3.2                                      |
|                        | 24                | 9.8                        | 0.1                                      | 9.3                       | 0.10                                    | 51.2                       | 0.7                                      | 451                        | 3                                        | bdl                        | /                                        | 28.7                       | 0.2                                      | 100                        | 1.1                                      | 15.0                       | 5.5                                      | 0.9                        | 0.6                                      | 18.9                       | 9.5                                      |
|                        | 48                | 9.7                        | 0.1                                      | 9.2                       | 0.11                                    | 51.2                       | 0.5                                      | 450                        | 5                                        | 12.2                       | /                                        | 29.1                       | 0.2                                      | 100                        | 0.9                                      | 15.5                       | 5.2                                      | 0.5                        | 0.04                                     | 16.0                       | 2.5                                      |
|                        | 74                | 9.7                        | 0.1                                      | 9.2                       | 0.10                                    | 51.3                       | 0.7                                      | 451                        | 4                                        | 10.1                       | /                                        | 30.8                       | 1.4                                      | 105                        | 5.3                                      | 17.4                       | 8.1                                      | 0.5                        | 0.1                                      | 16.8                       | 1.4                                      |
|                        | 94                | 9.8                        | 0.1                                      | 9.2                       | 0.12                                    | 51.3                       | 0.4                                      | 450                        | 6                                        | bdl                        | /                                        | 30.5                       | 0.3                                      | 102                        | 0.6                                      | 19.3                       | 4.6                                      | 0.4                        | 0.1                                      | 15.1                       | 5.6                                      |
|                        | 120               | 9.8                        | 0.1                                      | 9.2                       | 0.12                                    | 51.3                       | 0.3                                      | 452                        | 6                                        | 10.6                       | /                                        | 30.9                       | 0.2                                      | 101                        | 0.7                                      | 16.5                       | 1.6                                      | 0.4                        | 0.1                                      | 15.9                       | 4.4                                      |
|                        | 144               | 9.8                        | 0.1                                      | 9.2                       | 0.09                                    | 51.4                       | 0.7                                      | 451                        | 4                                        | bdl                        | /                                        | 26.7                       | 0.7                                      | 105                        | 3.0                                      | 16.4                       | 6.3                                      | 0.4                        | 0.1                                      | 9.6                        | 4.1                                      |
|                        | 192               | 9.9                        | 0.1                                      | 9.3                       | 0.08                                    | 52.1                       | 0.2                                      | 457                        | 4                                        | bdl                        | /                                        | 27.0                       | 0.8                                      | 107                        | 2.8                                      | 14.1                       | 2.9                                      | 0.4                        | 0.1                                      | 10.4                       | 6.3                                      |
|                        | 288               | 9.7                        | 0.4                                      | 9.2                       | 0.30                                    | 51.4                       | 1.8                                      | 449                        | 15                                       | bdl                        | /                                        | 26.9                       | 0.3                                      | 108                        | 1.7                                      | 14.0                       | 2.5                                      | 0.5                        | 0.2                                      | 14.2                       | 1.2                                      |
| 480                    | 10.0              | 0.2                        | 9.4                                      | 0.05                      | 52.0                                    | 0.4                        | 457                                      | 3                          | bdl                                      | /                          | 26.9                                     | 0.2                        | 107                                      | 1.2                        | 13.9                                     | 2.4                        | 0.4                                      | 0.0                        | 11.0                                     | 5.5                        |                                          |
| Sand turbulent         | 1                 | 9.8                        | 0.1                                      | 9.3                       | 0.13                                    | 51.4                       | 0.5                                      | 454                        | 6                                        | 9.1                        | 0.8                                      | 28.6                       | 0.3                                      | 98.1                       | 0.5                                      | 28.6                       | 11.7                                     | 1.4                        | 0.3                                      | 29.2                       | 14.5                                     |
|                        | 4                 | 9.7                        | 0.1                                      | 9.1                       | 0.08                                    | 51.0                       | 0.4                                      | 447                        | 3                                        | 8.6                        | /                                        | 28.2                       | 0.4                                      | 98.3                       | 0.6                                      | 15.3                       | 5.4                                      | 1.0                        | 0.4                                      | 32.0                       | 12.2                                     |
|                        | 24                | 9.8                        | 0.1                                      | 9.3                       | 0.10                                    | 51.9                       | 0.2                                      | 455                        | 6                                        | 46.0                       | 20.4                                     | 29.3                       | 0.3                                      | 101                        | 0.2                                      | 71.0                       | 51.3                                     | 4.9                        | 4.3                                      | 244.0                      | 232                                      |
|                        | 48                | 9.8                        | 0.04                                     | 9.2                       | 0.03                                    | 51.4                       | 0.3                                      | 453                        | 1                                        | bdl                        | /                                        | 29.3                       | 0.3                                      | 101                        | 1.1                                      | 36.0                       | 35.4                                     | 0.7                        | 0.3                                      | 26.8                       | 8.4                                      |
|                        | 74                | 9.9                        | 0.04                                     | 9.3                       | 0.04                                    | 51.8                       | 0.4                                      | 454                        | 1                                        | bdl                        | /                                        | 30.5                       | 0.0                                      | 103                        | 0.5                                      | 20.0                       | 2.7                                      | 0.9                        | 0.5                                      | 14.8                       | 4.0                                      |
|                        | 94                | 9.7                        | 0.2                                      | 9.2                       | 0.12                                    | 51.0                       | 0.0                                      | 448                        | 6                                        | 8.1                        | /                                        | 30.1                       | 0.3                                      | 102                        | 0.6                                      | 12.1                       | 3.7                                      | 0.8                        | 0.4                                      | 15.0                       | 5.0                                      |
|                        | 120               | 10.0                       | 0.1                                      | 9.4                       | 0.13                                    | 52.4                       | 0.8                                      | 463                        | 6                                        | bdl                        | /                                        | 32.2                       | 0.9                                      | 105                        | 3.2                                      | 17.4                       | 6.0                                      | 0.6                        | 0.1                                      | 14.5                       | 2.0                                      |
|                        | 144               | 9.8                        | 0.2                                      | 9.3                       | 0.15                                    | 51.6                       | 0.7                                      | 453                        | 7                                        | bdl                        | /                                        | 27.0                       | 0.5                                      | 105                        | 1.3                                      | 93.3                       | 127.3                                    | 1.0                        | 0.9                                      | 12.9                       | 4.8                                      |
|                        | 192               | 10.1                       | 0.1                                      | 9.5                       | 0.06                                    | 52.6                       | 0.3                                      | 462                        | 3                                        | bdl                        | /                                        | 27.8                       | 0.5                                      | 109                        | 2.2                                      | 15.0                       | 2.0                                      | 0.5                        | 0.1                                      | 9.6                        | 1.6                                      |
|                        | 288               | 9.9                        | 0.0                                      | 9.3                       | 0.02                                    | 51.7                       | 0.1                                      | 455                        | 1                                        | bdl                        | /                                        | 27.0                       | 0.0                                      | 107                        | 0.5                                      | 12.9                       | 5.1                                      | 0.3                        | 0.03                                     | 10.0                       | 1.8                                      |
| 480                    | 9.9               | 0.0                        | 9.3                                      | 0.04                      | 51.9                                    | 0.4                        | 453                                      | 2                          | bdl                                      | /                          | 27.5                                     | 1.1                        | 109                                      | 2.8                        | 15.9                                     | 5.6                        | 0.5                                      | 0.04                       | 12.7                                     | 9.5                        |                                          |
| Olivine-sand stagnant  | 1                 | 9.7                        | 0.1                                      | 9.2                       | 0.11                                    | 51.0                       | 0.6                                      | 448                        | 5                                        | bdl                        | /                                        | 28.1                       | 0.2                                      | 98.1                       | 0.2                                      | 27.2                       | 5.0                                      | 0.9                        | 0.2                                      | 56.6                       | 28.1                                     |
|                        | 4                 | 9.7                        | 0.05                                     | 9.2                       | 0.02                                    | 50.9                       | 0.5                                      | 450                        | 1                                        | bdl                        | /                                        | 28.2                       | 0.2                                      | 98.6                       | 1.1                                      | 16.8                       | 3.2                                      | 0.6                        | 0.1                                      | 23.7                       | 6.3                                      |
|                        | 24                | 9.7                        | 0.1                                      | 9.2                       | 0.10                                    | 51.3                       | 0.4                                      | 450                        | 5                                        | bdl                        | /                                        | 29.1                       | 0.2                                      | 100                        | 0.7                                      | 25.3                       | 13.5                                     | 0.6                        | 0.1                                      | 25.9                       | 2.6                                      |
|                        | 48                | 9.9                        | 0.1                                      | 9.3                       | 0.07                                    | 51.9                       | 0.5                                      | 456                        | 4                                        | bdl                        | /                                        | 29.7                       | 0.1                                      | 102                        | 0.4                                      | 15.8                       | 1.3                                      | 0.7                        | 0.2                                      | 15.7                       | 2.8                                      |
|                        | 74                | 9.8                        | 0.1                                      | 9.2                       | 0.18                                    | 51.4                       | 0.5                                      | 452                        | 8                                        | bdl                        | /                                        | 29.6                       | 0.1                                      | 102                        | 0.5                                      | 16.8                       | 1.8                                      | 0.6                        | 0.1                                      | 18.6                       | 2.3                                      |
|                        | 94                | 9.8                        | 0.2                                      | 9.2                       | 0.05                                    | 51.6                       | 0.1                                      | 453                        | 2                                        | bdl                        | /                                        | 31.0                       | 0.3                                      | 102                        | 2.2                                      | 17.0                       | 2.4                                      | 0.5                        | /                                        | 16.9                       | 2.5                                      |
|                        | 120               | 9.6                        | 0.2                                      | 9.0                       | 0.07                                    | 50.6                       | 0.3                                      | 442                        | 3                                        | bdl                        | /                                        | 26.7                       | 0.3                                      | 101                        | 2.0                                      | 16.5                       | 4.2                                      | 0.5                        | 0.1                                      | 14.5                       | 3.8                                      |
|                        | 144               | 9.8                        | 0.1                                      | 9.3                       | 0.10                                    | 51.3                       | 0.5                                      | 452                        | 5                                        | bdl                        | /                                        | 26.2                       | 0.3                                      | 104                        | 1.0                                      | 16.3                       | 5.5                                      | 0.3                        | 0.2                                      | 6.1                        | 1.6                                      |
|                        | 192               | 9.9                        | 0.1                                      | 9.3                       | 0.11                                    | 51.7                       | 0.2                                      | 458                        | 5                                        | bdl                        | /                                        | 26.5                       | 0.3                                      | 105                        | 1.0                                      | 14.0                       | 1.4                                      | 0.3                        | 0.0                                      | 11.2                       | 3.6                                      |
|                        | 288               | 9.9                        | 0.04                                     | 9.3                       | 0.05                                    | 52.0                       | 0.4                                      | 457                        | 3                                        | bdl                        | /                                        | 26.2                       | 0.2                                      | 106                        | 1.0                                      | 13.1                       | 5.8                                      | 0.5                        | 0.1                                      | 12.8                       | 3.3                                      |
| 480                    | 9.9               | 0.2                        | 9.3                                      | 0.04                      | 51.9                                    | 0.3                        | 455                                      | 2                          | bdl                                      | /                          | 26.8                                     | 0.6                        | 109                                      | 2.5                        | 12.0                                     | 1.7                        | 0.4                                      | 0.0                        | 10.1                                     | 4.5                        |                                          |
| Olivine-sand turbulent | 1                 | 9.8                        | 0.1                                      | 9.2                       | 0.06                                    | 51.0                       | 0.1                                      | 449                        | 2                                        | 44.6                       | 26.5                                     | 28.7                       | 0.3                                      | 100                        | 0.6                                      | 171                        | 58.9                                     | 8.9                        | 5.9                                      | 359                        | 211                                      |
|                        | 4                 | 9.8                        | 0.1                                      | 9.3                       | 0.05                                    | 51.8                       | 0.4                                      | 454                        | 3                                        | 22.3                       | 10.9                                     | 28.7                       | 0.1                                      | 100                        | 0.4                                      | 78.5                       | 34.9                                     | 3.5                        | 1.7                                      | 157                        | 56.4                                     |
|                        | 24                | 9.8                        | 0.1                                      | 9.3                       | 0.15                                    | 51.6                       | 0.6                                      | 452                        | 7                                        | 10.7                       | 2.9                                      | 29.6                       | 0.4                                      | 101                        | 1.5                                      | 49.5                       | 15.6                                     | 2.0                        | 0.8                                      | 73.7                       | 18.1                                     |
|                        | 48                | 9.9                        | 0.1                                      | 9.3                       | 0.10                                    | 51.9                       | 0.5                                      | 456                        | 4                                        | 6.9                        | 0.3                                      | 29.7                       | 0.2                                      | 101                        | 0.5                                      | 25.6                       | 6.9                                      | 1.0                        | 0.2                                      | 40.4                       | 10.0                                     |
|                        | 74                | 9.8                        | 0.11                                     | 9.3                       | 0.11                                    | 51.8                       | 0.5                                      | 456                        | 6                                        | 10.2                       | 0.1                                      |                            |                                          |                            |                                          |                            |                                          |                            |                                          |                            |                                          |

Table S4: Mineralogical composition of the starting materials dunite (olivine) and sand as well as the different experimental treatments after the experiment.

| Sample                   | Olivine wt.% | Pyroxene wt.% | Chlorite wt.% | Kaolinite wt.% | Talc wt.% | Muscovite wt.% | Antigorite wt.% | Plagioclase wt.% | Microcline wt.% | Quartz wt.% | Calcite wt.% | Mg-Calcite wt.% | Aragonite wt.% | Halite wt.% | Gypsum wt.% | Sum wt.% | Rwp - |
|--------------------------|--------------|---------------|---------------|----------------|-----------|----------------|-----------------|------------------|-----------------|-------------|--------------|-----------------|----------------|-------------|-------------|----------|-------|
| Olivine - turbulent      | 92           | 5.0           | 0.5           | 1.3            | 0.2       | 0.2            | 0.4             | 0.0              | 0.0             | 0.0         | 0.0          | 0.0             | 0.0            | 0.0         | 0.0         | 100.0    | 3.43  |
| Olivine - stagnant       | 90           | 7.2           | 0.3           | 1.7            | 0.3       | 0.4            | 0.5             | 0.0              | 0.0             | 0.0         | 0.0          | 0.0             | 0.0            | 0.0         | 0.0         | 100.0    | 3.58  |
| Sand - turbulent         | 0.0          | 0.0           | 0.9           | 0.0            | 0.0       | 1.2            | 0.0             | 19               | 10              | 51          | 7.0          | 4.4             | 3.4            | 1.9         | 1.3         | 100.0    | 4.68  |
| Sand - stagnant          | 0.0          | 0.0           | 0.5           | 0.0            | 0.0       | 1.0            | 0.0             | 19               | 11              | 54          | 6.7          | 2.9             | 2.8            | 2.4         | 0.3         | 100.0    | 4.85  |
| Olivine/Sand - turbulent | 22           | 2.5           | 0.3           | 0.5            | 0.3       | 1.0            | 0.2             | 14               | 9               | 39          | 4.6          | 1.6             | 4.1            | 1.4         | 0.4         | 100.0    | 4.09  |
| Olivine/Sand - stagnant  | 24           | 2.2           | 0.3           | 0.4            | 0.3       | 2.0            | 0.3             | 14               | 9               | 36          | 6.0          | 1.4             | 2.4            | 2.0         | 0.2         | 100.0    | 4.45  |
| Sand starting material   | 0.0          | 0.0           | 0.5           | 0.0            | 0.0       | 1.5            | 0.0             | 19               | 11              | 49          | 7.6          | 1.5             | 4.4            | 4.8         | 0.0         | 100.0    | 4.56  |
| Dunite starting material | 93           | 3.9           | 0.6           | 1.0            | 0.4       | 0.5            | 0.8             | 0.0              | 0.0             | 0.0         | 0.0          | 0.0             | 0.0            | 0.0         | 0.0         | 100.0    | 3.42  |

Table S5: Major and trace element composition of the starting materials dunite (olivine) and sand as well as the different experimental treatments after the experiment.

| Oxide         |      | Dunite starting material | Sand starting material | Olivine - turbulent | Olivine - stagnant | Sand - turbulent | Sand - stagnant | Olivine/Sand - turbulent | Olivine/Sand - stagnant |
|---------------|------|--------------------------|------------------------|---------------------|--------------------|------------------|-----------------|--------------------------|-------------------------|
| SiO2          | wt.% | 41.25                    | 61.49                  | 40.73               | 40.66              | 62.32            | 62.23           | 59.52                    | 57.67                   |
| TiO2          | wt.% | <0.05                    | 0.07                   | <0.05               | <0.05              | 0.08             | 0.07            | <0.05                    | 0.05                    |
| Al2O3         | wt.% | 0.43                     | 9.64                   | 0.14                | 0.25               | 9.40             | 9.47            | 7.15                     | 7.37                    |
| Fe2O3         | wt.% | 7.75                     | 0.48                   | 7.84                | 7.78               | 0.45             | 0.43            | 2.33                     | 1.98                    |
| MnO           | wt.% | 0.10                     | <0.05                  | 0.10                | 0.10               | <0.05            | <0.05           | <0.05                    | <0.05                   |
| MgO           | wt.% | 49.38                    | 0.48                   | 49.72               | 49.49              | 0.34             | 0.33            | 13.12                    | 10.64                   |
| CaO           | wt.% | 0.09                     | 10.55                  | 0.11                | 0.10               | 9.75             | 9.20            | 6.45                     | 7.55                    |
| K2O           | wt.% | <0.05                    | 3.70                   | <0.05               | <0.05              | 3.79             | 3.82            | 3.02                     | 2.93                    |
| Na2O          | wt.% | <0.1                     | 2.06                   | <0.1                | <0.1               | 1.95             | 1.96            | 1.35                     | 1.45                    |
| P2O5          | wt.% | <0.1                     | <0.1                   | <0.1                | <0.1               | <0.1             | <0.1            | <0.1                     | <0.1                    |
| SO3           | wt.% | <0.05                    | 0.22                   | <0.05               | <0.05              | 0.47             | 0.19            | 0.29                     | 0.17                    |
| LOI           | wt.% | 0.44                     | 11.14                  | 0.82                | 1.05               | 11.29            | 12.15           | 6.50                     | 9.95                    |
| Sum           | wt.% | 99.48                    | 99.86                  | 99.53               | 99.50              | 99.86            | 99.87           | 99.80                    | 99.80                   |
| <b>Traces</b> |      |                          |                        |                     |                    |                  |                 |                          |                         |
| V             | ppm  | <50                      | <50                    | <50                 | <50                | <50              | <50             | <50                      | <50                     |
| Cr            | ppm  | 1912                     | <50                    | 1342                | 1653               | <50              | <50             | 242                      | 321                     |
| Ni            | ppm  | 3193                     | <50                    | 3235                | 3205               | <50              | <50             | 835                      | 675                     |
| Cu            | ppm  | <50                      | <50                    | <50                 | <50                | <50              | <50             | <50                      | <50                     |
| Zn            | ppm  | 51                       | <50                    | <50                 | <50                | <50              | <50             | <50                      | <50                     |
| Ga            | ppm  | <50                      | <50                    | <50                 | <50                | <50              | <50             | <50                      | <50                     |
| Rb            | ppm  | <50                      | 143                    | <50                 | <50                | 143              | 145             | 116                      | 114                     |
| Sr            | ppm  | <50                      | 730                    | <50                 | <50                | 681              | 656             | 469                      | 534                     |
| Y             | ppm  | <50                      | <50                    | <50                 | <50                | <50              | <50             | <50                      | <50                     |
| Zr            | ppm  | <50                      | 59                     | <50                 | <50                | 76               | 62              | <50                      | 60                      |
| Pb            | ppm  | <50                      | <50                    | <50                 | <50                | <50              | <50             | <50                      | <50                     |
| Ba            | ppm  | <50                      | 364                    | <50                 | <50                | 370              | 377             | 238                      | 233                     |
| Nb            | ppm  | <50                      | <50                    | <50                 | <50                | <50              | <50             | <50                      | <50                     |
| Co            | ppm  | <50                      | <50                    | <50                 | <50                | <50              | <50             | <50                      | <50                     |
| Sum           | ppm  | 5228                     | 1407                   | 4702                | 4986               | 1374             | 1341            | 2030                     | 2022                    |
